# Supplementary material for: Synthesis of bis(cyclic carbonate) and propylene carbonate via a one-pot coupling reaction of CO2, bisepoxide and propylene oxide
Source: Royal Society of Chemistry journal article supplement (doi:10.1039/c3ra42570c), 2013-01-01
Supplement: c3ra42570c.pdf [file c3ra42570c.pdf]

## Supporting Information

### **Synthesis of Bis(cyclic carbonate) and Propylene Carbonate via a One-pot Coupling Reaction of CO<sub>2</sub>, Bisepoxide and Propylene Oxide**

Ren-Jian Wei, Xing-Hong Zhang\*, Bin-Yang Du, Zhi-Qiang Fan, Guo-Rong Qi

MOE Key Laboratory of Macromolecular Synthesis and Functionalization, Department of Polymer Science and Engineering, Zhejiang University, Hangzhou, 310027, China.

*CORRESPONDING AUTHOR: Prof. Xing-Hong Zhang*

*Tel and Fax: +86-571 87953732; E-mail: xhzhang@zju.edu.cn*

- 1. FT-IR spectra of the various bis(cyclic carbonate)s.**
- 2. <sup>1</sup>H NMR spectra of the various bis(cyclic carbonate)s.**
- 3. <sup>1</sup>H NMR spectrum of the produced PC during the one-pot mixed coupling reaction.**
- 4. Photo of the produced bis(cyclic carbonate)s.**
- 5. FT-IR spectra of the various polyurethanes derived from the polyadditions of different bis(cyclic carbonate)s with 1,6-hexamethylenediamine.**
- 6. <sup>1</sup>H NMR spectra of the the various polyurethanes derived from the polyadditions of different bis(cyclic carbonate)s with 1,6-hexamethylenediamine.**
- 7. GPC of the produced various polyurethanes.**

## 1. FT-IR spectra of the various bis(cyclic carbonate)s.

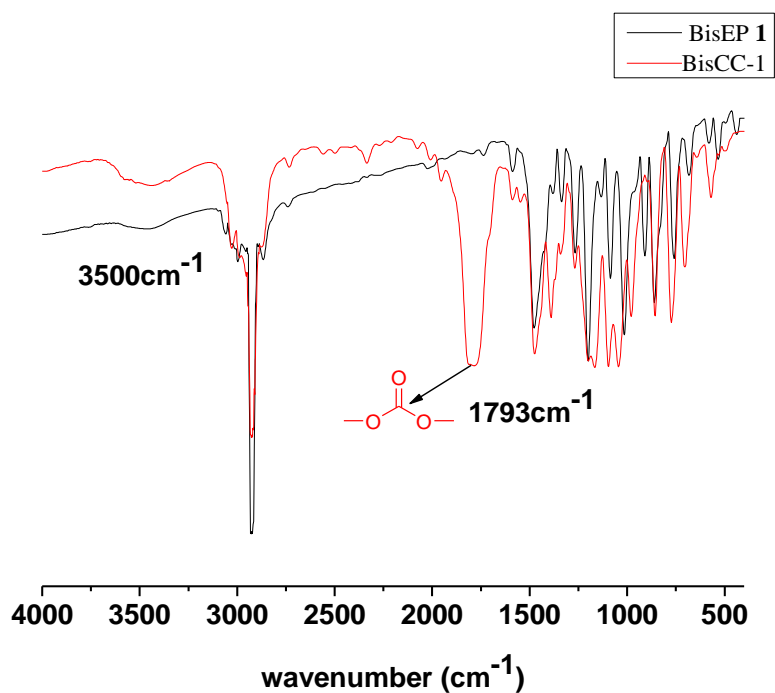

**Figure S1.** FT-IR spectra of the 4,4-bis(2,3-epoxypropoxy)-3,3,5,5-tetramethylbiphenyl (BisEP 1) and BisCC-1.

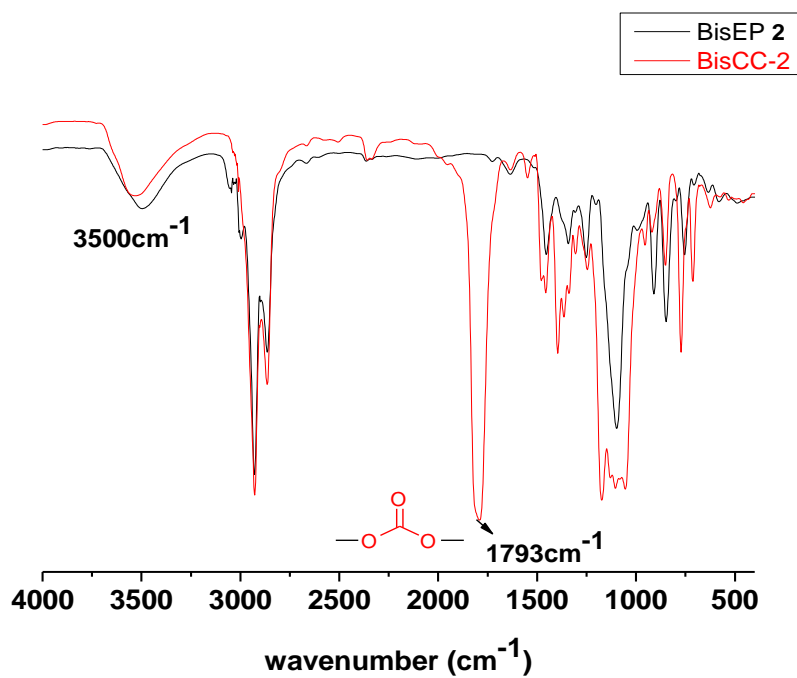

**Figure S2.** FT-IR spectra of the cyclohexanediol diglycidyl ether (BisEP 2) and BisCC-2.

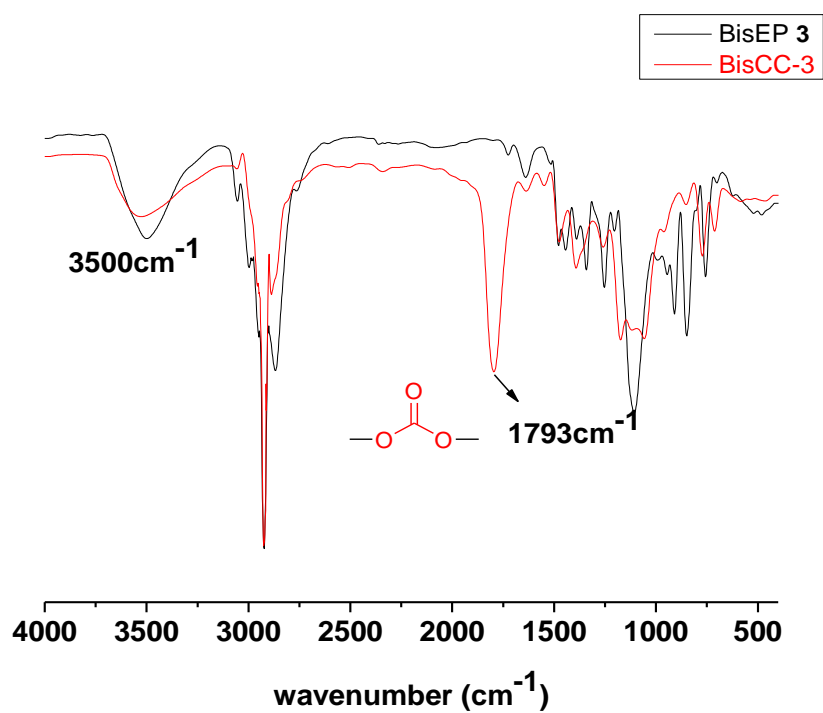

Figure S3. FT-IR spectra of the butanediol diglycidyl ether (BisEP 3) and BisCC-3.

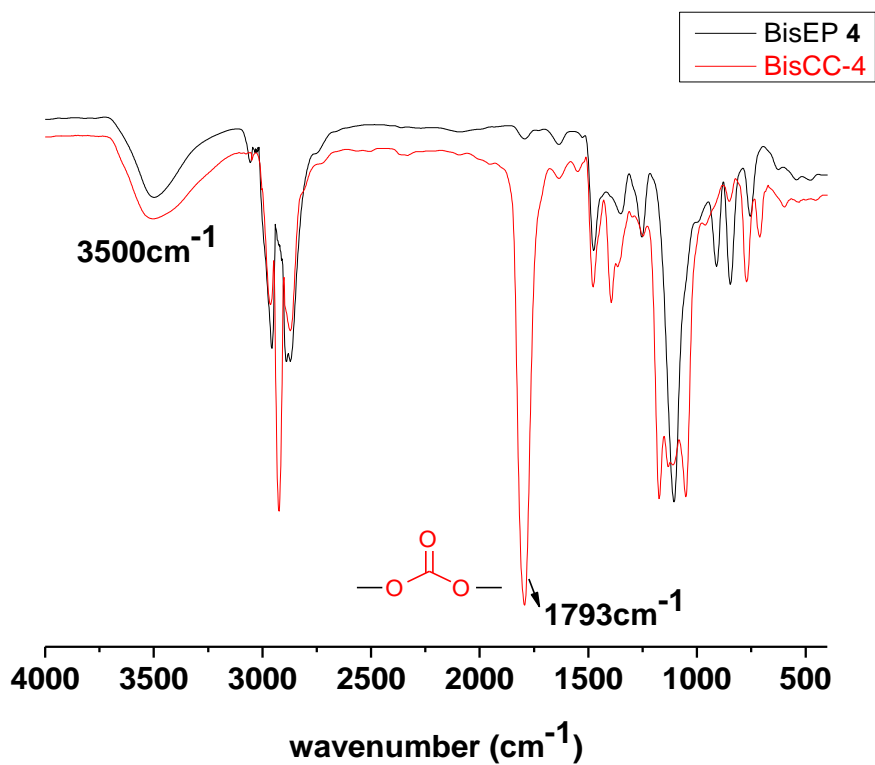

Figure S4. FT-IR spectra of the neopentyl glycol diglycidyl ether (BisEP 4) and BisCC-4.

## 2. $^1\text{H}$ NMR spectra of the various bis(cyclic carbonate)s.

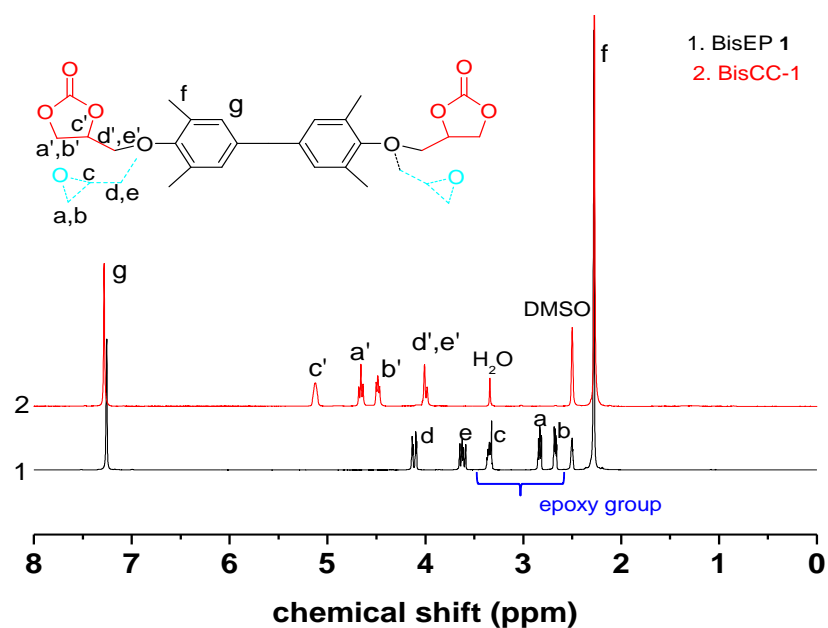

**Figure S5.** <sup>1</sup>H NMR spectra of the BisCC-1 (line 2) and 4,4-bis(2,3-epoxypropoxy)-3,3,5,5-tetramethylbiphenyl (BisEP 1, line 1).

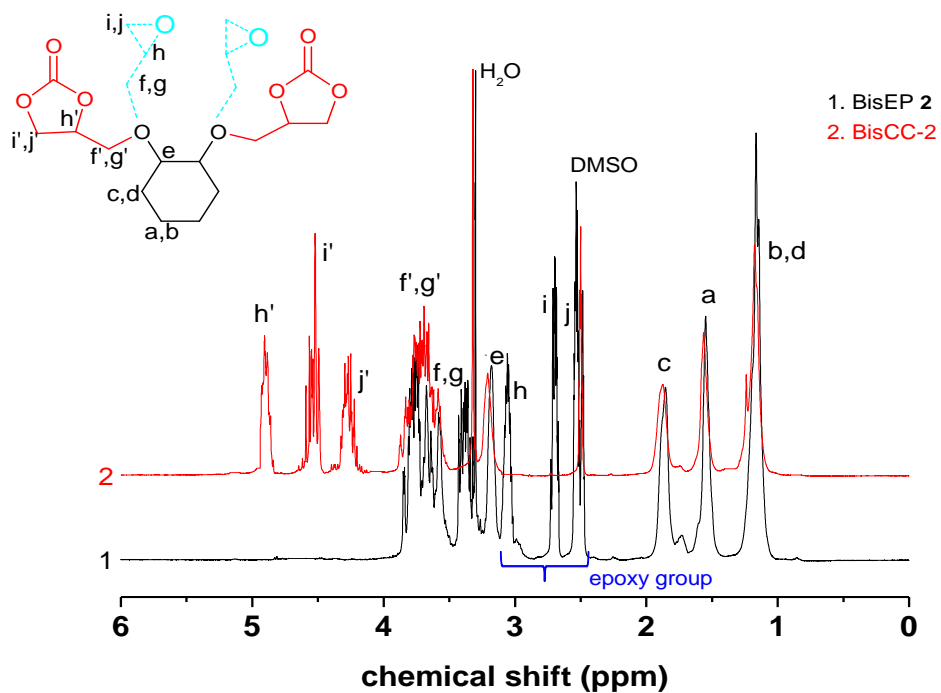

**Figure S6.** <sup>1</sup>H NMR spectra of the BisCC-2 (line 2) and cyclohexanediol diglycidyl ether (BisEP 2, line 1).

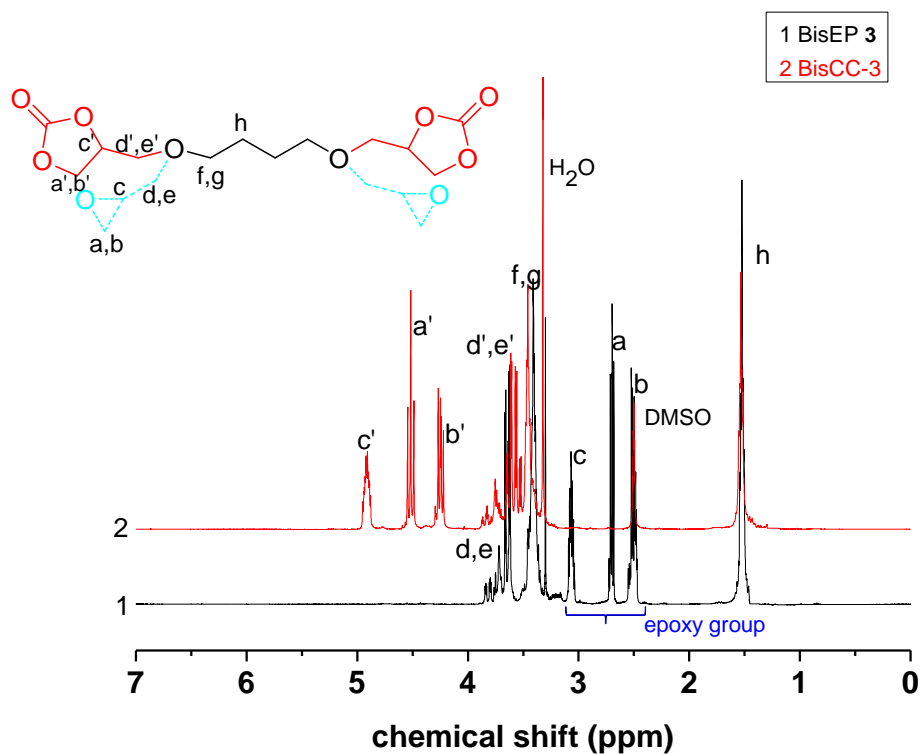

Figure S7.  $^1\text{H}$  NMR spectra of the butanediol diglycidyl ether (BisEP 3, line 1) and BisCC-3 (line 2).

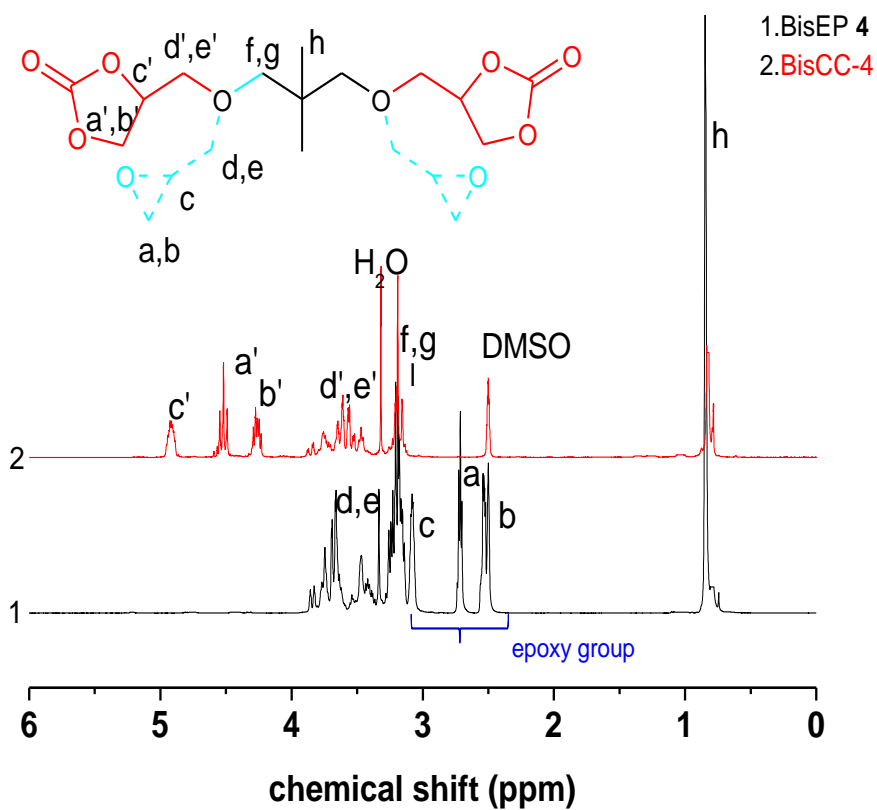

Figure S8.  $^1\text{H}$  NMR spectra of the neopentyl glycol diglycidyl ether (BisEP 4, line 1) and BisCC-4 (line 2).

### 3. Photo of the produced bis(cyclic carbonate)s.

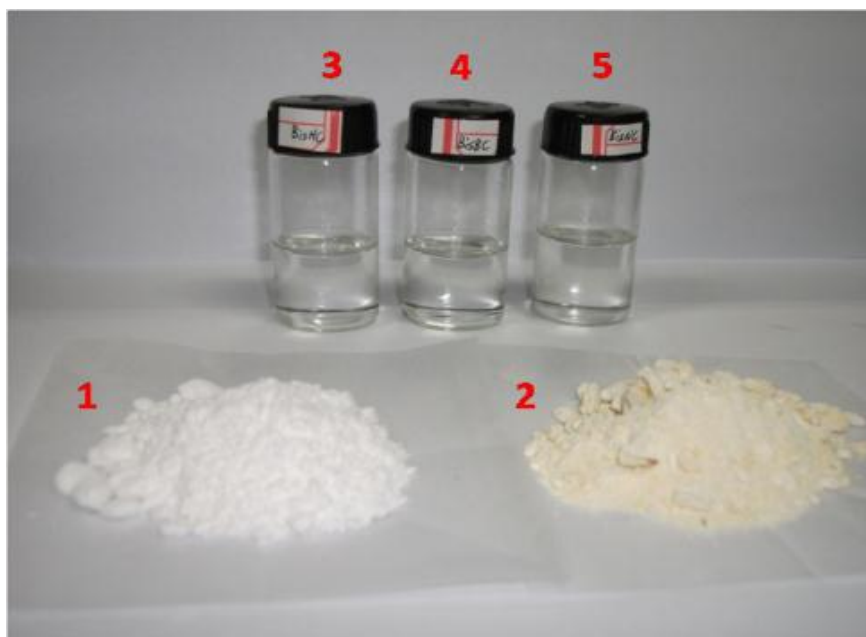

**Figure S9.** Photo of the bis(cyclic carbonate)s. 1: BisAC, 2: BisCC-1, 3: BisCC-2, 4: BisCC-4, 5: BisCC-4.

### 4. $^1\text{H}$ NMR spectrum of the produced PC during the one-pot mixed coupling reaction of bisepoxide, PO and $\text{CO}_2$ .

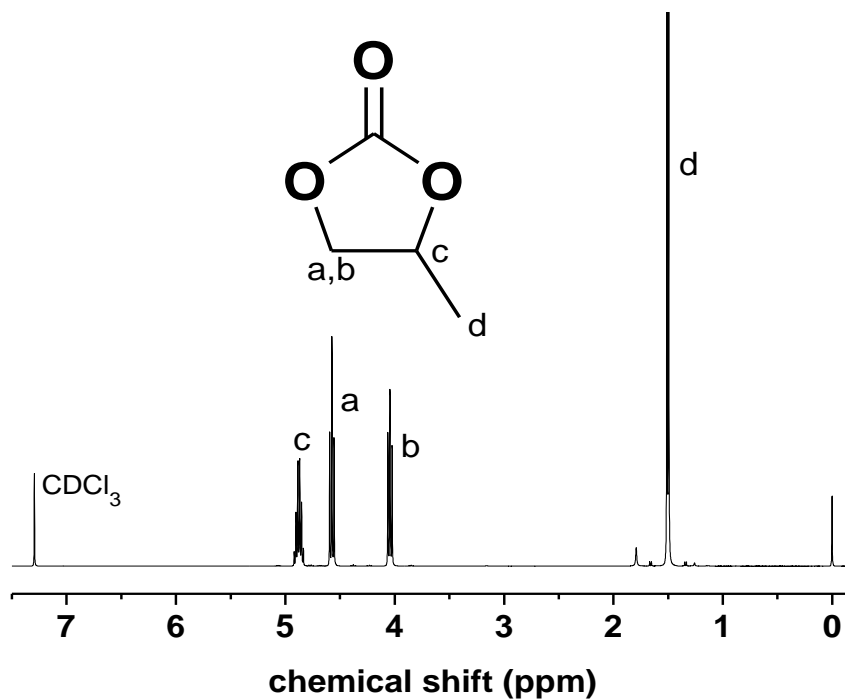

**Figure S10.**  $^1\text{H}$  NMR spectrum of the produced PC during the one-pot mixed coupling reaction of bisepoxides, PO and  $\text{CO}_2$ .

**5. FT-IR spectra of the various polyurethane derived from the polyaddition of different bis(cyclic carbonate)s and 1,6-hexamethylenediamine.**

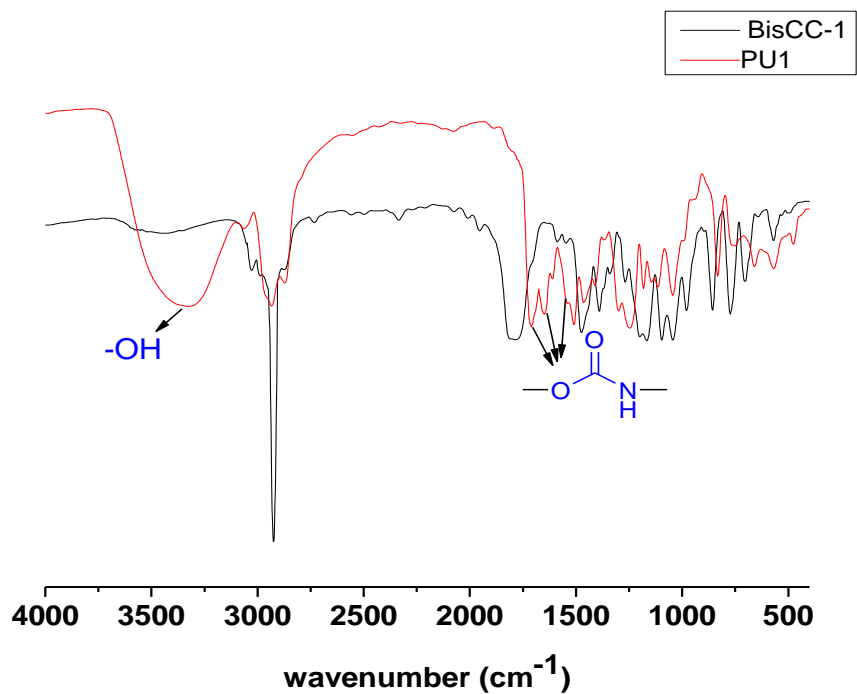

**Figure S11.** FT-IR spectra of the PU1 derived from BisCC-1 and 1,6-hexamethylenediamine.

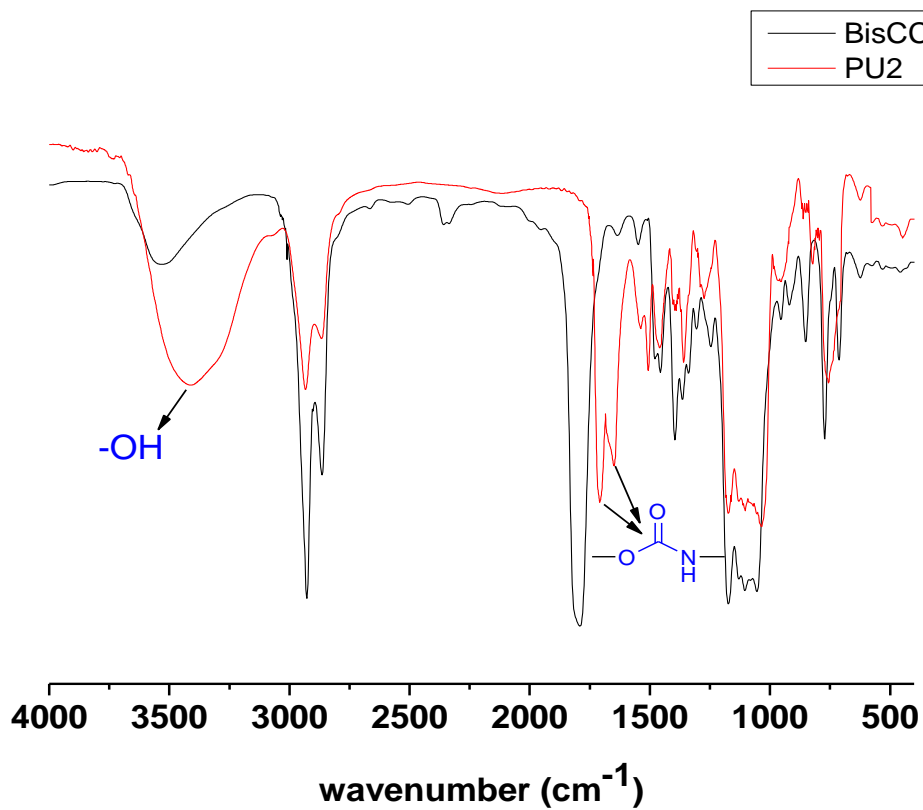

**Figure S12.** FT-IR spectra of the PU2 derived from BisCC-2 and 1,6-hexamethylenediamine.

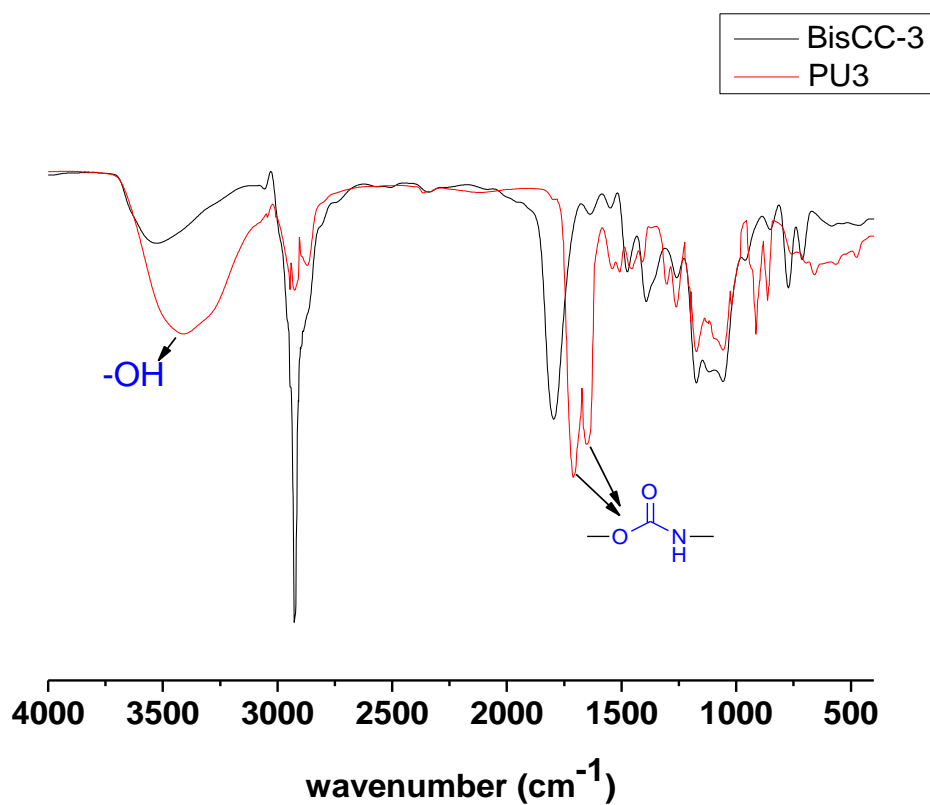

Figure S13. FT-IR spectra of the PU3 derived from BisCC-3 and 1,6-hexamethylenediamine.

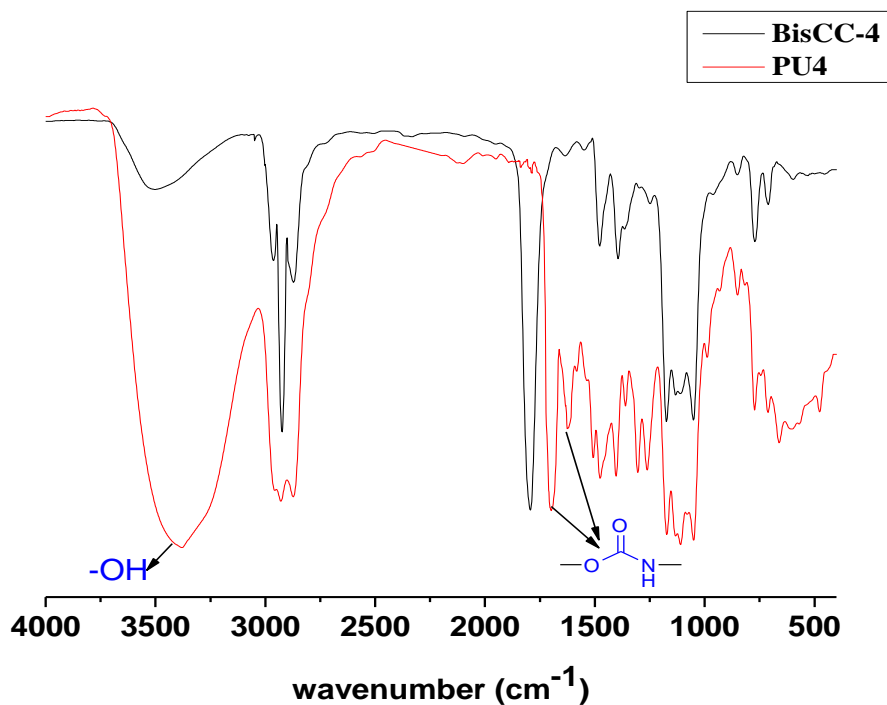

Figure S14. FT-IR spectra of the PU4 derived from BisCC-4 and 1,6-hexamethylenediamine.



**6.  $^1\text{H}$  NMR spectra of the various polyurethanes derived from the polyadditions of different bis(cyclic carbonate)s and 1,6-hexamethylenediamine.**

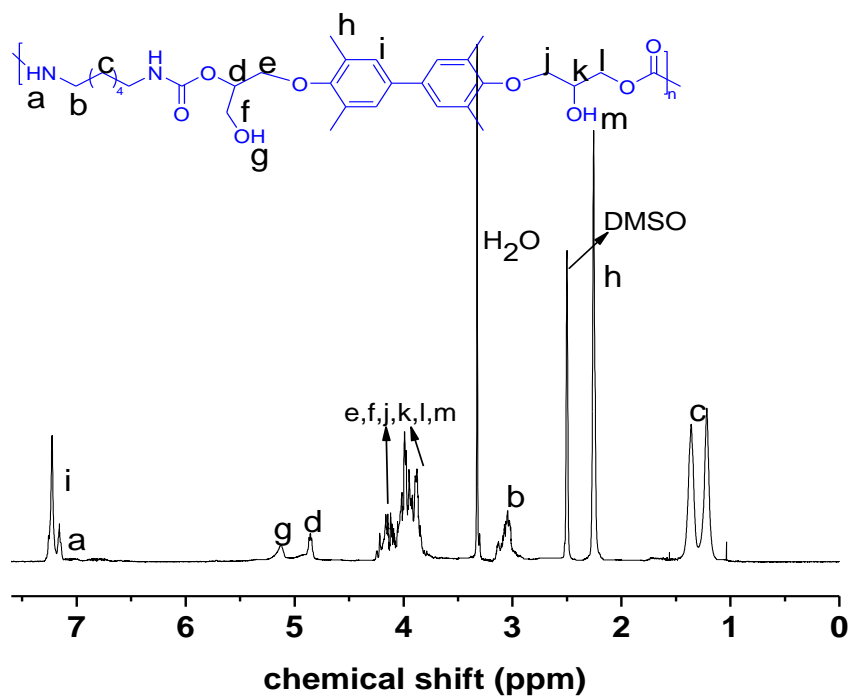

**Figure S15.**  $^1\text{H}$  NMR spectra of the PU1 derived from BisCC-1 and 1,6-hexamethylenediamine.

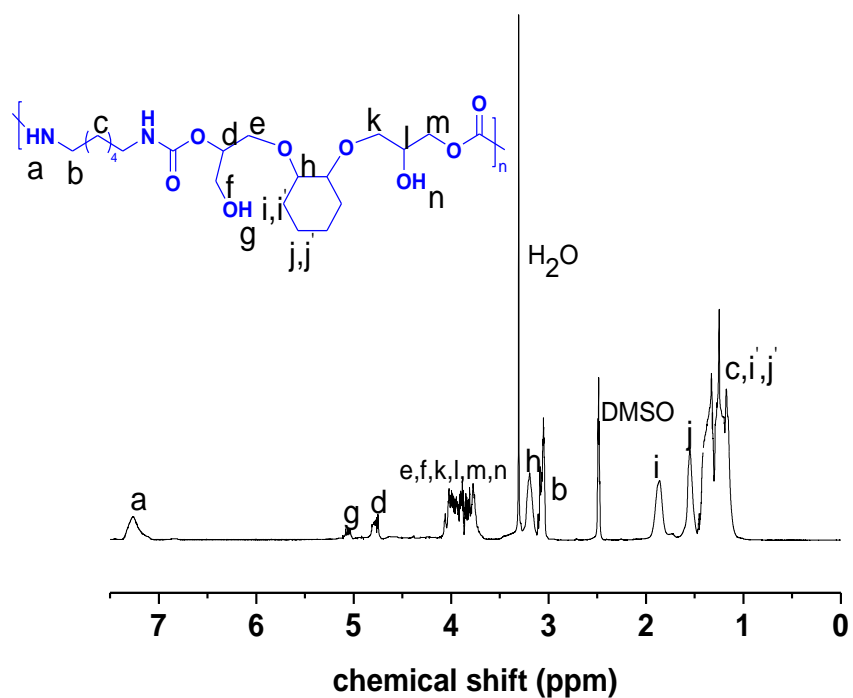

**Figure S16.**  $^1\text{H}$  NMR spectra of the PU2 derived from BisCC-2 and 1,6-hexamethylenediamine.

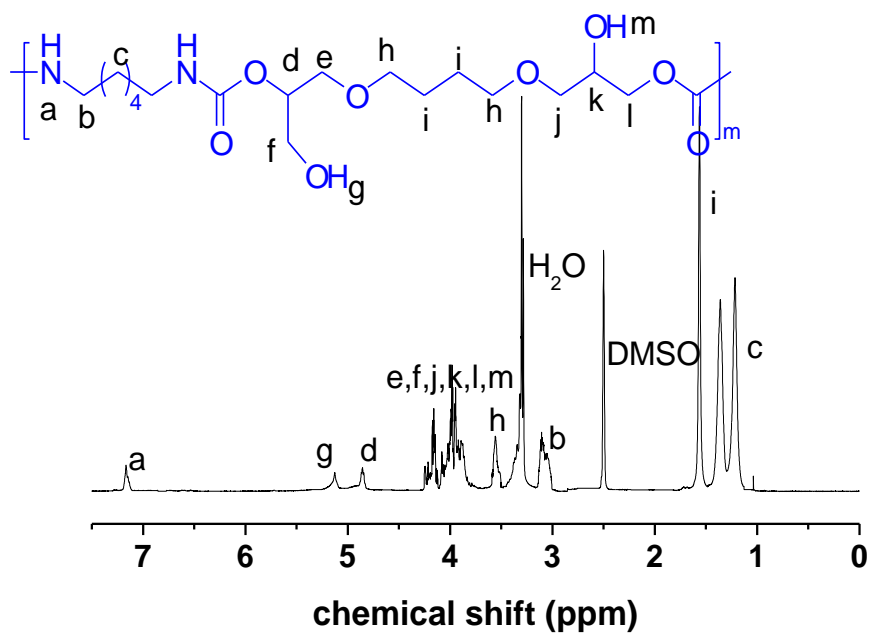

Figure S17. <sup>1</sup>H NMR spectra of the PU3 derived from BisCC-3 and 1,6-hexamethylenediamine.

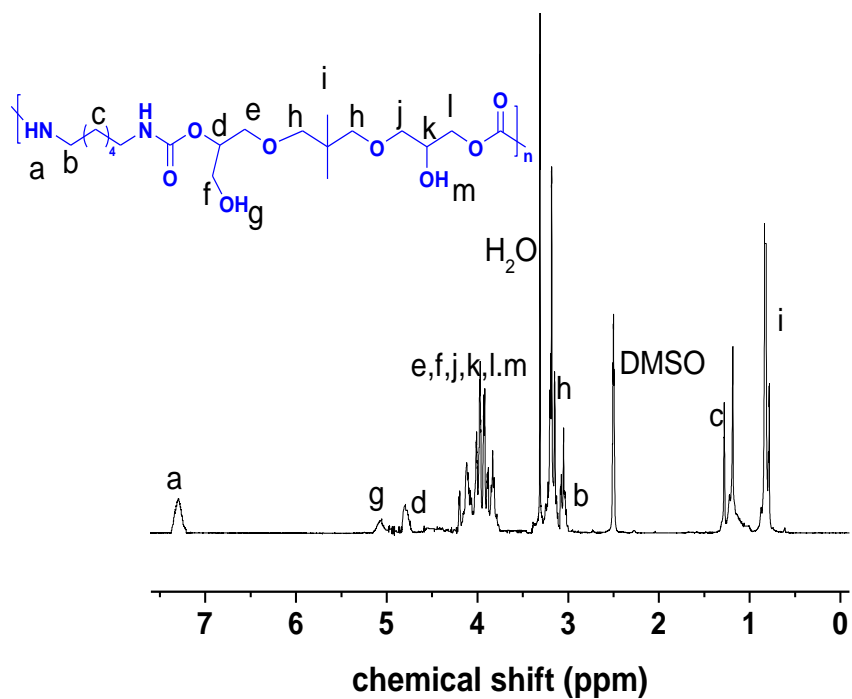

Figure S18. <sup>1</sup>H NMR spectra of the PU4 derived from BisCC-4 and 1,6-hexamethylenediamine.

## 7. GPC of the produced various polyurethanes.

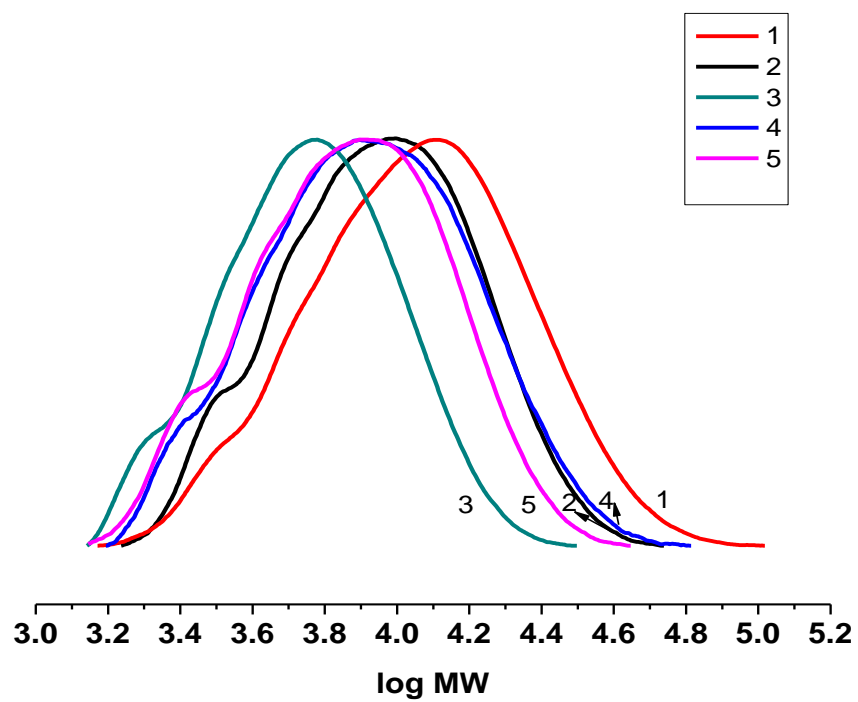

**Figure S19.** GPC curves of the produced PUs (line 1-5) derived from BisAC, BisCC-1, BisCC-2, BisCC-3 and BisCC-4 respectively.
